# Supplementary material for: Bayesian Population Physiologically-Based Pharmacokinetic (PBPK) Approach for a Physiologically Realistic Characterization of Interindividual Variability in Clinically Relevant Populations
Source: PubMed Central journal article supplement (PMC4592188; doi:10.1371/journal.pone.0139423), 2015-10-02
Supplement: pone.0139423.s001.pdf [file pone.0139423.s001.pdf]

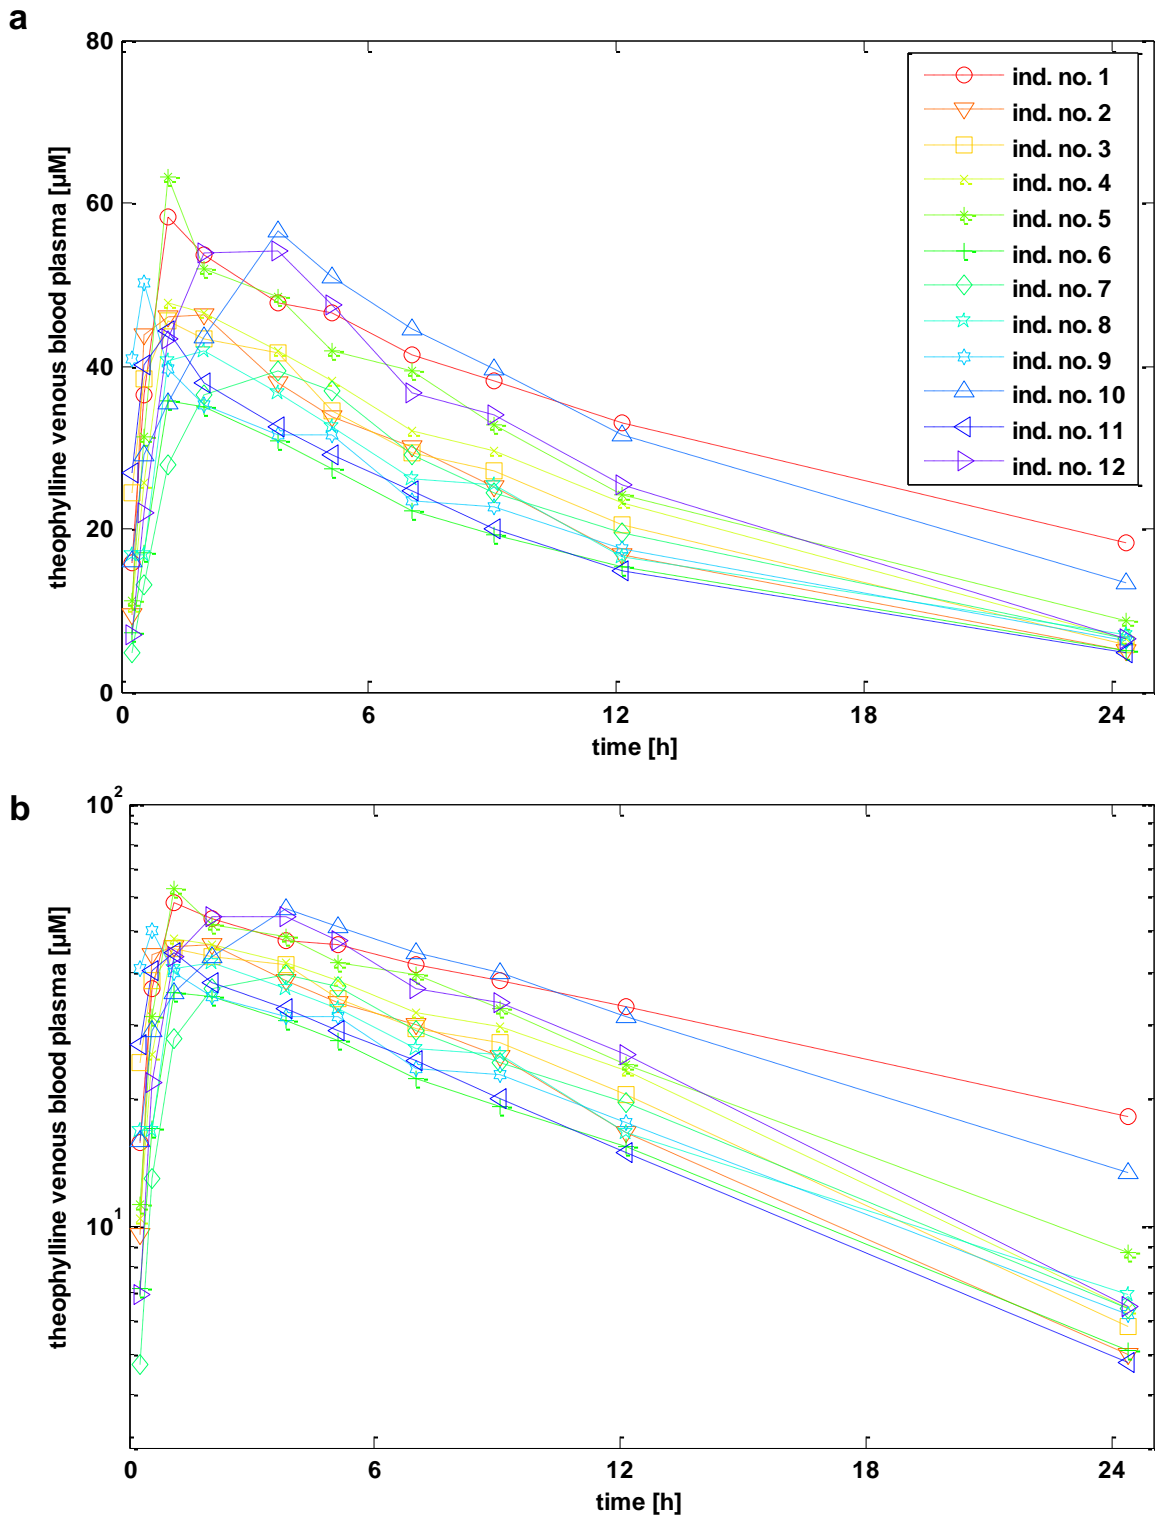

**Figure S1: Experimental data of theophylline pharmacokinetics.** The individual data is also provided in S2 Table. (a) Experimental data on linear scale. (b) Experimental data on semi-log scale.
