# Supplementary material for: Bayesian Population Physiologically-Based Pharmacokinetic (PBPK) Approach for a Physiologically Realistic Characterization of Interindividual Variability in Clinically Relevant Populations
Source: PubMed Central journal article supplement (PMC4592188; doi:10.1371/journal.pone.0139423), 2015-10-02
Supplement: pone.0139423.s003.pdf [file pone.0139423.s003.pdf]

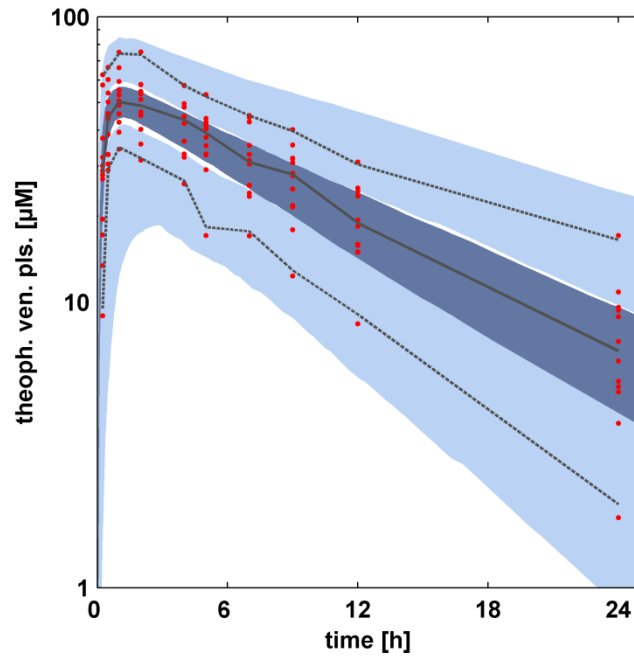

**Figure S3: Visual predictive check (VPC) of the pharmacokinetic behavior using the posterior distributions of the positive control run based on the presented Bayesian population PBPK approach.** The maximum posterior estimates of the population parameters have been used to estimate the posterior population distributions. The VPCs were performed as described in the text. In each VPC, the 5 % and 95 % percentiles (black dotted lines) and the median (black line) of the experimental data (red dots) are compared against the 95 % confidence intervals of the 5 % and 95 % percentile of the simulation (light blue area) and the median (blue area).
