# Supplementary material for: Bayesian Population Physiologically-Based Pharmacokinetic (PBPK) Approach for a Physiologically Realistic Characterization of Interindividual Variability in Clinically Relevant Populations
Source: PubMed Central journal article supplement (PMC4592188; doi:10.1371/journal.pone.0139423), 2015-10-02
Supplement: pone.0139423.s004.pdf [file pone.0139423.s004.pdf]

**Table S1: Varied individual parameters together with start value and parameters constraints (min., max.) of the final MCMC run. Start values are exemplary for individual 1, start values for the other individuals differ slightly.**

| Name                            | Type       | Unit           | Start value | Min. value | Max. value | Prior distribution |
|---------------------------------|------------|----------------|-------------|------------|------------|--------------------|
| Intestinal permeability         | Individual | dm/min         | 1.32E-06    | 3.57E-08   | 3.57E-04   | Lognormal          |
| Hepatic clearance constant      | Individual | 1/min          | 9.31E-03    | 5.00E-03   | 5.00E-01   | Lognormal          |
| Renal clearance constant        | Individual | 1/min          | 3.17E-02    | 2.00E-03   | 2.00E-01   | Lognormal          |
| Stomach gastric emptying time   | Individual | min            | 29.333      | 10.000     | 30.000     | Lognormal          |
| Small intestinal transit time   | Individual | min            | 199.070     | 90.000     | 240.000    | Lognormal          |
| Plasma protein scale factor     | Individual | -              | 0.844       | 0.700      | 1.300      | Lognormal          |
| Venous Blood volume             | Individual | L              | 1.020       | 0.763      | 1.174      | Normal             |
| Arterial Blood volume           | Individual | L              | 0.462       | 0.332      | 0.510      | Normal             |
| Bone specific blood flow rate   | Individual | L/min/kg organ | 0.026       | 0.023      | 0.032      | Normal             |
| Bone volume                     | Individual | L              | 12.675      | 9.443      | 14.230     | Normal             |
| Brain volume                    | Individual | L              | 1.687       | 1.282      | 1.735      | Normal             |
| Brain specific blood flow rate  | Individual | L/min/kg organ | 0.566       | 0.439      | 0.594      | Normal             |
| Fat volume                      | Individual | L              | 22.422      | 3.641      | 58.480     | Lognormal          |
| Fat specific blood flow rate    | Individual | L/min/kg organ | 0.020       | 0.019      | 0.025      | Normal             |
| Gonads volume                   | Individual | L              | 0.040       | 0.032      | 0.049      | Normal             |
| Gonads specific blood flow rate | Individual | L/min/kg organ | 0.074       | 0.069      | 0.093      | Normal             |
| Heart volume                    | Individual | L              | 0.341       | 0.165      | 0.696      | Normal             |
| Heart specific blood flow rate  | Individual | L/min/kg organ | 0.594       | 0.530      | 0.717      | Normal             |
| Kidney volume                   | Individual | L              | 0.425       | 0.106      | 0.806      | Normal             |

|                                          |            |                |        |        |        |           |
|------------------------------------------|------------|----------------|--------|--------|--------|-----------|
| Kidney specific blood flow rate          | Individual | L/min/kg organ | 2.897  | 2.573  | 3.481  | Normal    |
| Stomach volume                           | Individual | L              | 0.153  | 0.086  | 0.259  | Normal    |
| Stomach specific blood flow rate         | Individual | L/min/kg organ | 0.366  | 0.328  | 0.444  | Normal    |
| Small intestine volume                   | Individual | L              | 0.622  | 0.438  | 1.036  | Normal    |
| Small intestine specific blood flow rate | Individual | L/min/kg organ | 0.849  | 0.763  | 1.032  | Normal    |
| Large intestine volume                   | Individual | L              | 0.445  | 0.159  | 0.693  | Normal    |
| Large intestine specific blood flow rate | Individual | L/min/kg organ | 0.592  | 0.536  | 0.725  | Normal    |
| Liver volume                             | Individual | L              | 0.837  | 0.655  | 4.249  | Normal    |
| Liver specific blood flow rate           | Individual | L/min/kg organ | 0.171  | 0.152  | 0.206  | Normal    |
| Lung volume                              | Individual | L              | 1.166  | 0.549  | 3.012  | Lognormal |
| Muscle volume                            | Individual | L              | 31.096 | 20.080 | 50.163 | Lognormal |
| Muscle specific blood flow rate          | Individual | L/min/kg organ | 0.038  | 0.029  | 0.039  | Normal    |
| Pancreas volume                          | Individual | L              | 0.184  | 0.034  | 0.364  | Normal    |
| Pancreas specific blood flow rate        | Individual | L/min/kg organ | 0.351  | 0.291  | 0.393  | Normal    |
| Portal vein volume                       | Individual | L              | 1.079  | 0.821  | 1.263  | Normal    |
| Skin volume                              | Individual | L              | 4.578  | 2.745  | 4.889  | Normal    |
| Skin specific blood flow rate            | Individual | L/min/kg organ | 0.079  | 0.073  | 0.099  | Normal    |
| Spleen volume                            | Individual | L              | 0.370  | 0.067  | 0.870  | Lognormal |
| Spleen specific blood flow rate          | Individual | L/min/kg organ | 0.740  | 0.681  | 0.921  | Normal    |
| Lipophilicity                            | Global     | -              | 1.380  | -1.000 | 1.500  | Uniform   |
| Unbound protein fraction                 | Global     | -              | 0.355  | 0.330  | 0.500  | Uniform   |
| Measurement error                        | Global     | -              | 0.137  | 0.010  | 1.000  | Jeffreys  |
