# Supplementary material for: Bayesian Population Physiologically-Based Pharmacokinetic (PBPK) Approach for a Physiologically Realistic Characterization of Interindividual Variability in Clinically Relevant Populations
Source: PubMed Central journal article supplement (PMC4592188; doi:10.1371/journal.pone.0139423), 2015-10-02
Supplement: pone.0139423.s005.pdf [file pone.0139423.s005.pdf]

**Table S2: Experimental data of theophylline pharmacokinetics.** Data are from Boeckmann et al. (Boeckmann et al, 1994) and can be found as ‘theoph’ data frame in the software package R.

| ID | Subject | Body Weight [kg] | Dose [mg/kg] | Time [h] | Concentration [mg/L] |
|----|---------|------------------|--------------|----------|----------------------|
| 1  | 1       | 79.6             | 4.02         | 0        | 0.74                 |
| 2  | 1       | 79.6             | 4.02         | 0.25     | 2.84                 |
| 3  | 1       | 79.6             | 4.02         | 0.57     | 6.57                 |
| 4  | 1       | 79.6             | 4.02         | 1.12     | 10.5                 |
| 5  | 1       | 79.6             | 4.02         | 2.02     | 9.66                 |
| 6  | 1       | 79.6             | 4.02         | 3.82     | 8.58                 |
| 7  | 1       | 79.6             | 4.02         | 5.1      | 8.36                 |
| 8  | 1       | 79.6             | 4.02         | 7.03     | 7.47                 |
| 9  | 1       | 79.6             | 4.02         | 9.05     | 6.89                 |
| 10 | 1       | 79.6             | 4.02         | 12.12    | 5.94                 |
| 11 | 1       | 79.6             | 4.02         | 24.37    | 3.28                 |
| 12 | 2       | 72.4             | 4.4          | 0        | 0                    |
| 13 | 2       | 72.4             | 4.4          | 0.27     | 1.72                 |
| 14 | 2       | 72.4             | 4.4          | 0.52     | 7.91                 |
| 15 | 2       | 72.4             | 4.4          | 1        | 8.31                 |
| 16 | 2       | 72.4             | 4.4          | 1.92     | 8.33                 |
| 17 | 2       | 72.4             | 4.4          | 3.5      | 6.85                 |
| 18 | 2       | 72.4             | 4.4          | 5.02     | 6.08                 |
| 19 | 2       | 72.4             | 4.4          | 7.03     | 5.4                  |
| 20 | 2       | 72.4             | 4.4          | 9        | 4.55                 |
| 21 | 2       | 72.4             | 4.4          | 12       | 3.01                 |
| 22 | 2       | 72.4             | 4.4          | 24.3     | 0.9                  |
| 23 | 3       | 70.5             | 4.53         | 0        | 0                    |
| 24 | 3       | 70.5             | 4.53         | 0.27     | 4.4                  |
| 25 | 3       | 70.5             | 4.53         | 0.58     | 6.9                  |
| 26 | 3       | 70.5             | 4.53         | 1.02     | 8.2                  |
| 27 | 3       | 70.5             | 4.53         | 2.02     | 7.8                  |
| 28 | 3       | 70.5             | 4.53         | 3.62     | 7.5                  |
| 29 | 3       | 70.5             | 4.53         | 5.08     | 6.2                  |
| 30 | 3       | 70.5             | 4.53         | 7.07     | 5.3                  |
| 31 | 3       | 70.5             | 4.53         | 9        | 4.9                  |
| 32 | 3       | 70.5             | 4.53         | 12.15    | 3.7                  |
| 33 | 3       | 70.5             | 4.53         | 24.17    | 1.05                 |
| 34 | 4       | 72.7             | 4.4          | 0        | 0                    |
| 35 | 4       | 72.7             | 4.4          | 0.35     | 1.89                 |
| 36 | 4       | 72.7             | 4.4          | 0.6      | 4.6                  |
| 37 | 4       | 72.7             | 4.4          | 1.07     | 8.6                  |
| 38 | 4       | 72.7             | 4.4          | 2.13     | 8.38                 |
| 39 | 4       | 72.7             | 4.4          | 3.5      | 7.54                 |

|    |   |      |      |       |      |
|----|---|------|------|-------|------|
| 40 | 4 | 72.7 | 4.4  | 5.02  | 6.88 |
| 41 | 4 | 72.7 | 4.4  | 7.02  | 5.78 |
| 42 | 4 | 72.7 | 4.4  | 9.02  | 5.33 |
| 43 | 4 | 72.7 | 4.4  | 11.98 | 4.19 |
| 44 | 4 | 72.7 | 4.4  | 24.65 | 1.15 |
| 45 | 5 | 54.6 | 5.86 | 0     | 0    |
| 46 | 5 | 54.6 | 5.86 | 0.3   | 2.02 |
| 47 | 5 | 54.6 | 5.86 | 0.52  | 5.63 |
| 48 | 5 | 54.6 | 5.86 | 1     | 11.4 |
| 49 | 5 | 54.6 | 5.86 | 2.02  | 9.33 |
| 50 | 5 | 54.6 | 5.86 | 3.5   | 8.74 |
| 51 | 5 | 54.6 | 5.86 | 5.02  | 7.56 |
| 52 | 5 | 54.6 | 5.86 | 7.02  | 7.09 |
| 53 | 5 | 54.6 | 5.86 | 9.1   | 5.9  |
| 54 | 5 | 54.6 | 5.86 | 12    | 4.37 |
| 55 | 5 | 54.6 | 5.86 | 24.35 | 1.57 |
| 56 | 6 | 80   | 4    | 0     | 0    |
| 57 | 6 | 80   | 4    | 0.27  | 1.29 |
| 58 | 6 | 80   | 4    | 0.58  | 3.08 |
| 59 | 6 | 80   | 4    | 1.15  | 6.44 |
| 60 | 6 | 80   | 4    | 2.03  | 6.32 |
| 61 | 6 | 80   | 4    | 3.57  | 5.53 |
| 62 | 6 | 80   | 4    | 5     | 4.94 |
| 63 | 6 | 80   | 4    | 7     | 4.02 |
| 64 | 6 | 80   | 4    | 9.22  | 3.46 |
| 65 | 6 | 80   | 4    | 12.1  | 2.78 |
| 66 | 6 | 80   | 4    | 23.85 | 0.92 |
| 67 | 7 | 64.6 | 4.95 | 0     | 0.15 |
| 68 | 7 | 64.6 | 4.95 | 0.25  | 0.85 |
| 69 | 7 | 64.6 | 4.95 | 0.5   | 2.35 |
| 70 | 7 | 64.6 | 4.95 | 1.02  | 5.02 |
| 71 | 7 | 64.6 | 4.95 | 2.02  | 6.58 |
| 72 | 7 | 64.6 | 4.95 | 3.48  | 7.09 |
| 73 | 7 | 64.6 | 4.95 | 5     | 6.66 |
| 74 | 7 | 64.6 | 4.95 | 6.98  | 5.25 |
| 75 | 7 | 64.6 | 4.95 | 9     | 4.39 |
| 76 | 7 | 64.6 | 4.95 | 12.05 | 3.53 |
| 77 | 7 | 64.6 | 4.95 | 24.22 | 1.15 |
| 78 | 8 | 70.5 | 4.53 | 0     | 0    |
| 79 | 8 | 70.5 | 4.53 | 0.25  | 3.05 |
| 80 | 8 | 70.5 | 4.53 | 0.52  | 3.05 |
| 81 | 8 | 70.5 | 4.53 | 0.98  | 7.31 |
| 82 | 8 | 70.5 | 4.53 | 2.02  | 7.56 |

|     |    |      |      |       |       |
|-----|----|------|------|-------|-------|
| 83  | 8  | 70.5 | 4.53 | 3.53  | 6.59  |
| 84  | 8  | 70.5 | 4.53 | 5.05  | 5.88  |
| 85  | 8  | 70.5 | 4.53 | 7.15  | 4.73  |
| 86  | 8  | 70.5 | 4.53 | 9.07  | 4.57  |
| 87  | 8  | 70.5 | 4.53 | 12.1  | 3     |
| 88  | 8  | 70.5 | 4.53 | 24.12 | 1.25  |
| 89  | 9  | 86.4 | 3.1  | 0     | 0     |
| 90  | 9  | 86.4 | 3.1  | 0.3   | 7.37  |
| 91  | 9  | 86.4 | 3.1  | 0.63  | 9.03  |
| 92  | 9  | 86.4 | 3.1  | 1.05  | 7.14  |
| 93  | 9  | 86.4 | 3.1  | 2.02  | 6.33  |
| 94  | 9  | 86.4 | 3.1  | 3.53  | 5.66  |
| 95  | 9  | 86.4 | 3.1  | 5.02  | 5.67  |
| 96  | 9  | 86.4 | 3.1  | 7.17  | 4.24  |
| 97  | 9  | 86.4 | 3.1  | 8.8   | 4.11  |
| 98  | 9  | 86.4 | 3.1  | 11.6  | 3.16  |
| 99  | 9  | 86.4 | 3.1  | 24.43 | 1.12  |
| 100 | 10 | 58.2 | 5.5  | 0     | 0.24  |
| 101 | 10 | 58.2 | 5.5  | 0.37  | 2.89  |
| 102 | 10 | 58.2 | 5.5  | 0.77  | 5.22  |
| 103 | 10 | 58.2 | 5.5  | 1.02  | 6.41  |
| 104 | 10 | 58.2 | 5.5  | 2.05  | 7.83  |
| 105 | 10 | 58.2 | 5.5  | 3.55  | 10.21 |
| 106 | 10 | 58.2 | 5.5  | 5.05  | 9.18  |
| 107 | 10 | 58.2 | 5.5  | 7.08  | 8.02  |
| 108 | 10 | 58.2 | 5.5  | 9.38  | 7.14  |
| 109 | 10 | 58.2 | 5.5  | 12.1  | 5.68  |
| 110 | 10 | 58.2 | 5.5  | 23.7  | 2.42  |
| 111 | 11 | 65   | 4.92 | 0     | 0     |
| 112 | 11 | 65   | 4.92 | 0.25  | 4.86  |
| 113 | 11 | 65   | 4.92 | 0.5   | 7.24  |
| 114 | 11 | 65   | 4.92 | 0.98  | 8     |
| 115 | 11 | 65   | 4.92 | 1.98  | 6.81  |
| 116 | 11 | 65   | 4.92 | 3.6   | 5.87  |
| 117 | 11 | 65   | 4.92 | 5.02  | 5.22  |
| 118 | 11 | 65   | 4.92 | 7.03  | 4.45  |
| 119 | 11 | 65   | 4.92 | 9.03  | 3.62  |
| 120 | 11 | 65   | 4.92 | 12.12 | 2.69  |
| 121 | 11 | 65   | 4.92 | 24.08 | 0.86  |
| 122 | 12 | 60.5 | 5.3  | 0     | 0     |
| 123 | 12 | 60.5 | 5.3  | 0.25  | 1.25  |
| 124 | 12 | 60.5 | 5.3  | 0.5   | 3.96  |
| 125 | 12 | 60.5 | 5.3  | 1     | 7.82  |

|     |    |      |     |       |      |
|-----|----|------|-----|-------|------|
| 126 | 12 | 60.5 | 5.3 | 2     | 9.72 |
| 127 | 12 | 60.5 | 5.3 | 3.52  | 9.75 |
| 128 | 12 | 60.5 | 5.3 | 5.07  | 8.57 |
| 129 | 12 | 60.5 | 5.3 | 7.07  | 6.59 |
| 130 | 12 | 60.5 | 5.3 | 9.03  | 6.11 |
| 131 | 12 | 60.5 | 5.3 | 12.05 | 4.57 |
| 132 | 12 | 60.5 | 5.3 | 24.15 | 1.17 |

## References

Boeckmann A, Sheiner L, Beal S (1994) NONMEM Users Guide: Part V. University of California, San Francisco,
