# Supplementary material for: Bayesian Population Physiologically-Based Pharmacokinetic (PBPK) Approach for a Physiologically Realistic Characterization of Interindividual Variability in Clinically Relevant Populations
Source: PubMed Central journal article supplement (PMC4592188; doi:10.1371/journal.pone.0139423), 2015-10-02
Supplement: pone.0139423.s006.pdf [file pone.0139423.s006.pdf]

**Table S3: Anthropometric parameters of the considered cohort of individuals.** Age was considered to be 30 years for all individuals. Body Height was considered to be different from individual to individual. Dose and body weight are described in the used dataset (1) and in Table S2.

| ID            | Population | Gender | Age [years] | Body Weight [kg] | Height [cm] | BMI   | Dose [mg/kg] | total dose [mg] |
|---------------|------------|--------|-------------|------------------|-------------|-------|--------------|-----------------|
| individual 1  | European   | male   | 30.00       | 79.60            | 182         | 24.03 | 4.02         | 319.99          |
| individual 2  | European   | male   | 30.00       | 72.40            | 173         | 24.19 | 4.40         | 318.56          |
| individual 3  | European   | male   | 30.00       | 70.50            | 189         | 19.74 | 4.53         | 319.37          |
| individual 4  | European   | male   | 30.00       | 72.70            | 180         | 22.44 | 4.40         | 319.88          |
| individual 5  | European   | male   | 30.00       | 54.60            | 160         | 21.33 | 5.86         | 319.96          |
| individual 6  | European   | male   | 30.00       | 80.00            | 183         | 23.89 | 4.00         | 320.00          |
| individual 7  | European   | male   | 30.00       | 64.60            | 184         | 19.08 | 4.95         | 319.77          |
| individual 8  | European   | male   | 30.00       | 70.50            | 185         | 20.60 | 4.53         | 319.37          |
| individual 9  | European   | male   | 30.00       | 86.40            | 190         | 23.93 | 3.10         | 267.84          |
| individual 10 | European   | male   | 30.00       | 58.20            | 167         | 20.87 | 5.50         | 320.10          |
| individual 11 | European   | male   | 30.00       | 65.00            | 176         | 20.98 | 4.92         | 319.80          |
| individual 12 | European   | male   | 30.00       | 60.50            | 174         | 19.98 | 5.30         | 320.65          |

## References

- (1) Boeckmann, A., Sheiner, L. & Beal, S. *NONMEM Users Guide: Part V* (University of California, San Francisco: 1994).
