# Supplementary material for: Bayesian Population Physiologically-Based Pharmacokinetic (PBPK) Approach for a Physiologically Realistic Characterization of Interindividual Variability in Clinically Relevant Populations
Source: PubMed Central journal article supplement (PMC4592188; doi:10.1371/journal.pone.0139423), 2015-10-02
Supplement: pone.0139423.s007.pdf [file pone.0139423.s007.pdf]

**Table S4: Gelman and Rubin convergence criterion.** Gelman and Rubin convergence criterion was determined after splitting the Markov chain into two chains with the same length.  $\hat{R}$  for individual parameters represents the mean value of all 12 individuals. For parameters with a high  $\hat{R}$ , convergence was calculated in addition for the Markov chain representing the functional relationship (see hepatic clearance x liver volume and kidney clearance x kidney volume). Overall mean value for  $\hat{R}$  is 1.14, when taking all 535 parameters into account.

| parameter                                        | parameter type | $\hat{R}$ |
|--------------------------------------------------|----------------|-----------|
| Intestinal permeability                          | individual     | 1.00      |
| Hepatic clearance constant                       | individual     | 1.17      |
| Renal clearance constant                         | individual     | 1.74      |
| Stomach gastric emptying time                    | individual     | 1.00      |
| Small intestinal transit time                    | individual     | 1.00      |
| Plasma protein scale factor                      | individual     | 1.01      |
| Fat volume                                       | individual     | 1.03      |
| Kidney volume                                    | individual     | 1.98      |
| Liver volume                                     | individual     | 1.22      |
| Muscle volume                                    | individual     | 1.02      |
| <i>Hepatic clearance constant x liver volume</i> | individual     | 1.11      |
| <i>Renal clearance constant x kidney volume</i>  | individual     | 1.01      |
| Lipophilicity                                    | global         | 1.02      |
| Unbound protein fraction                         | global         | 1.03      |
| Intestinal permeability                          | population     | 1.63      |
| Hepatic clearance constant                       | population     | 3.84      |
| Renal clearance constant                         | population     | 2.18      |
| Stomach gastric emptying time                    | population     | 1.00      |
| Small intestinal transit time                    | population     | 1.01      |
| Plasma protein scale factor                      | population     | 1.01      |
| Fat volume                                       | population     | 1.02      |
| Kidney volume                                    | population     | 2.33      |
| Liver volume                                     | population     | 1.54      |
| Muscle volume                                    | population     | 1.04      |
| <i>Hepatic clearance constant x liver volume</i> | population     | 1.03      |
| <i>Renal clearance constant x kidney volume</i>  | population     | 1.05      |
